# Supplementary material for: Clinical and genomic predictors of sipuleucel-T outcomes in men with metastatic androgen pathway modulator resistant prostate cancer
Source: Research Square preprint supplement (doi:10.21203/rs.3.rs-10042173/v1), 2026-07-01
Supplement: Supplementary file 1 [file 41bd3e323ed964ce66e5a4db.xlsx]

## Sheet: sheet 1
Table 1. Baseline demographic and clinical characteristics
Variable	Overall N = 185	No intercurrent therapy N = 70	Intercurrent therapy N = 115
Baseline age	70 (48 - 95)	67 (48 - 81)	70 (51 - 95)
Race
Black or African American	26 (14%)	10 (14%)	16 (14%)
White	157 (85%)	60 (86%)	97 (84%)
Another race	2 (1.1%)	0 (0%)	2 (1.7%)
History of Tobacco smoking	87 (47%)	33 (47%)	54 (47%)
ECOG
0	111 (60%)	40 (57%)	71 (62%)
1-3	74 (40%)	30 (43%)	44 (38%)
Documented to have pain at Sip-T initiation	30 (16%)	14 (20%)	16 (14%)
Month from diagnosis to therapy start	68 (7 - 290)	78 (9 - 251)	59 (7 - 290)
Unknown	1	1	0
Number of sipuleucel-T infusions
1	4 (2.2%)	2 (2.9%)	2 (1.7%)
3	181 (98%)	68 (97%)	113 (98%)
Intercurrent treatment
ARPI	111 (60%)	0 (0%)	111 (97%)
Radium-223	3 (1.6%)	0 (0%)	3 (2.6%)
Other	1 (0.5%)	0 (0%)	1 (0.9%)
None	70 (38%)	70 (100%)	0 (0%)
PSA Lab Value	2 (0 - 472)	2 (0 - 94)	1 (0 - 472)
Volume of disease
Low	111 (60%)	48 (69%)	63 (55%)
High	74 (40%)	22 (31%)	52 (45%)
Prior RP or XRT	122 (66%)	51 (73%)	71 (62%)
Prior ARPI	37 (20%)	20 (29%)	17 (15%)
Prior chemo	50 (27%)	18 (26%)	32 (28%)
Metastasis locations
Bone only	90 (49%)	28 (40%)	62 (54%)
Lymph node only	30 (16%)	12 (17%)	18 (16%)
Bone and lymph node	41 (22%)	23 (33%)	18 (16%)
Any visceral	7 (3.8%)	1 (1.4%)	6 (5.2%)
Other	1 (0.5%)	0 (0%)	1 (0.9%)
None	16 (8.6%)	6 (8.6%)	10 (8.7%)
Number of bone mets
1	25 (14%)	10 (14%)	15 (13%)
2-4	49 (26%)	21 (30%)	28 (24%)
5-9	28 (15%)	13 (19%)	15 (13%)
≥10	22 (12%)	5 (7.1%)	17 (15%)
Unknown	61 (33%)	21 (30%)	40 (35%)
HGB Lab Test	13.10 (8.70 - 16.50)	13.20 (9.50 - 16.10)	13.10 (8.70 - 16.50)
ANC Lab Value	3.60 (1.30 - 11.40)	3.90 (1.60 - 7.90)	3.60 (1.30 - 11.40)
NLR	2.74 (0.62 - 22.00)	2.50 (0.94 - 7.80)	2.82 (0.62 - 22.00)
LDH Lab Value	156 (79 - 1,235)	157 (79 - 410)	153 (80 - 1,235)
Albumin Lab Value	4.00 (2.80 - 4.70)	4.00 (3.50 - 4.70)	3.95 (2.80 - 4.70)
Alkaline Phosphatase	70 (23 - 396)	72 (23 - 231)	68 (29 - 396)
Prior testing
No prior testing	101 (55%)	46 (66%)	55 (48%)
Prior testing	84 (45%)	24 (34%)	60 (52%)
Median (Min - Max); n (%)	Median (Min - Max); n (%)	Median (Min - Max); n (%)	Median (Min - Max); n (%)
