# Supplementary material for: Clinical and genomic predictors of sipuleucel-T outcomes in men with metastatic androgen pathway modulator resistant prostate cancer
Source: Research Square preprint supplement (doi:10.21203/rs.3.rs-10042173/v1), 2026-07-01
Supplement: Supplementary file 2 [file 68d48f18a02395f09e252cb6.xlsx]

## Sheet: Sheet1
Table 2. Survival data by genomic information
	Contemporary genetic testing N=841
	Median OS	Median PFS	36-month survival
	(95% CI)	(95% CI)	(95% CI)
Microsatellite Status
High/Unstable	33 (20, —)	1.1 (0.46, —)	0% (—, —)
Low/Stable	35 (29, 48)	2.9 (2.4, 4.9)	49% (37%, 64%)
Unknown	30 (21, 56)	2.0 (1.7, 5.4)	33% (17%, 64%)
CDK12
No mutation	31 (27, 46)	2.7 (2.3, 4.1)	44% (34%, 57%)
Mutated	36 (29, —)	3.1 (1.7, —)	50% (22%, 100%)
PTEN
No loss	32 (29, 46)	2.7 (2.3, 4.3)	43% (31%, 58%)
Loss	30 (19, —)	2.7 (2.3, 7.9)	47% (29%, 76%)
MYC
Not amplified	35 (30, 48)	2.8 (2.3, 4.2)	49% (38%, 63%)
Amplified	11 (9.5, —)	2.2 (1.1, —)	10% (1.6%, 64%)
AR-amplification
No	35 (30, 48)	2.7 (2.3, 4.1)	48% (38%, 62%)
Yes	35 (30, 48)	1.7 (1.2, —)	0% (—, —)
1Median (Min - Max)
