# Supplementary material for: Clinical and genomic predictors of sipuleucel-T outcomes in men with metastatic androgen pathway modulator resistant prostate cancer
Source: Research Square preprint supplement (doi:10.21203/rs.3.rs-10042173/v1), 2026-07-01
Supplement: Supplementary file 3 [file 70a064486a8c14489d5496d9.xlsx]

## Sheet: Sheet1
Supplementary Table 1. Details of contemporary genetic testing
	Contemporary genetic testing
	N = 841
Number of genes altered
Number of alterations	3 (1, 4)
Number of alterations
<3	35 (42%)
≥3	49 (58%)
No genetic alterations	11 (13%)
Genetic Alterations
TP53	36 (43%)
AR amplification	7 (8.3%)
PTEN	19 (23%)
AR resistance	8 (9.5%)
TMPRSS2	23 (27%)
BRCA2	11 (13%)
MYC	10 (12%)
EGFR	4 (4.8%)
PIK3CA	5 (6.0%)
APC	6 (7.1%)
RB1	4 (4.8%)
ATM	3 (3.6%)
BRAF	3 (3.6%)
NF1	6 (7.1%)
CDK12	6 (7.1%)
MSI status
High/Unstable	3 (3.6%)
Low/Stable	62 (74%)
Unknown	19 (23%)
TMB (tissue)
Low	5 (71%)
High	2 (29%)
Unknown	77
1Median (Q1, Q3); n (%)
